# Supplementary material
Source: PubMed Central journal article supplement (PMC2796077)

**A** Keratinocytes

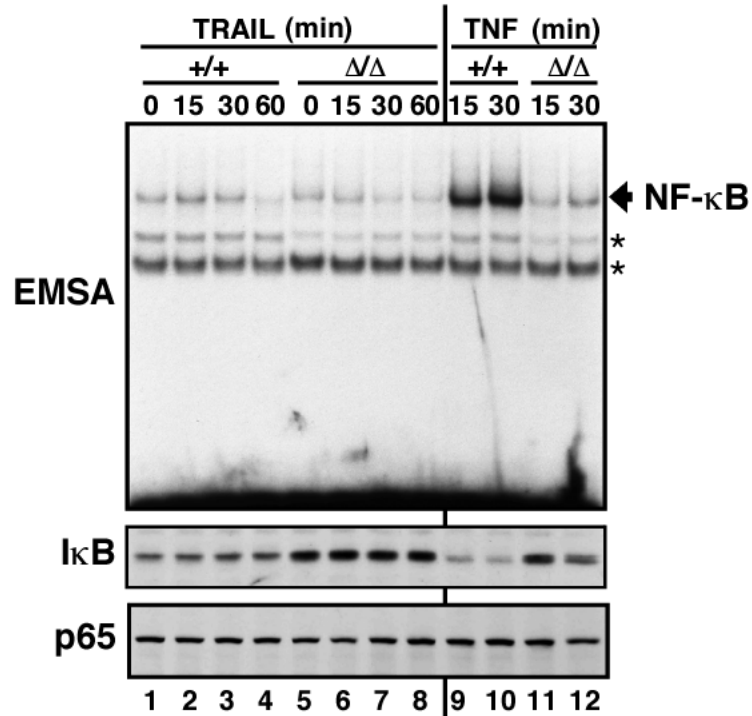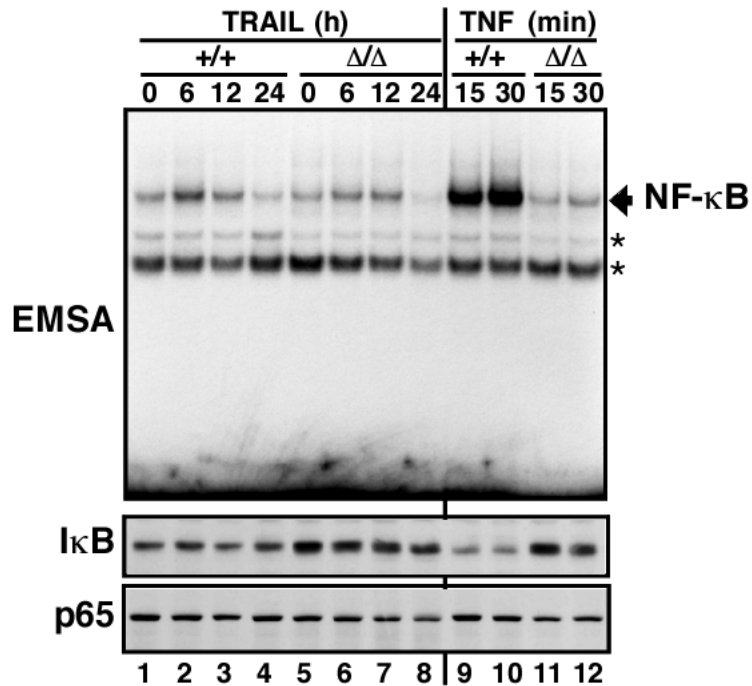

**B** Keratinocytes

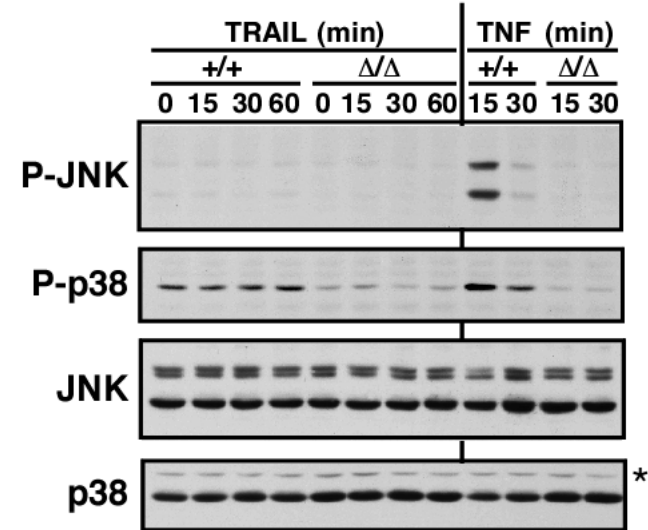

# Morioka et al. Supplementary Figure S2

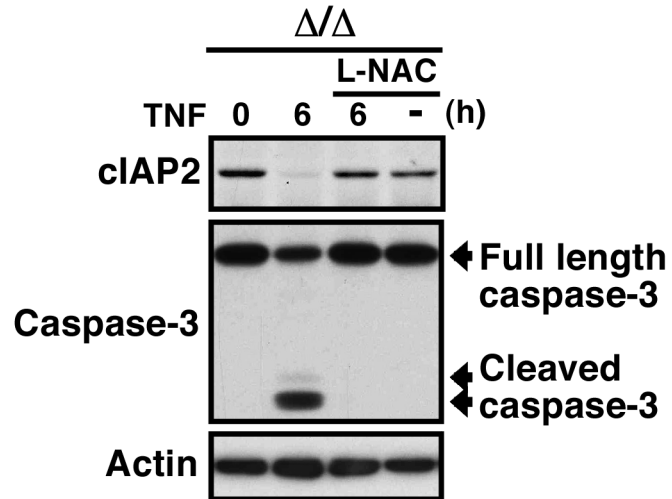

Supplement: NIHMS109561-supplement-2.pdf [file NIHMS109561-supplement-2.pdf]
